# Supplementary material for: U–Pb dating of CA/non-CA treated zircons obtained by LA-ICP-MS and CA-TIMS techniques: impact for their geological interpretation
Source: Royal Society of Chemistry journal article supplement (doi:10.1039/c4ja00102h), 2014-01-01
Supplement: c4ja00102h2.pdf [file c4ja00102h2.pdf]

Summary of obtained  $^{206}\text{Pb}/^{238}\text{U}$  ages; the grey box reflects the 2% level of variability.
