# Supplementary figures and images for: U–Pb dating of CA/non-CA treated zircons obtained by LA-ICP-MS and CA-TIMS techniques: impact for their geological interpretation
Source: Royal Society of Chemistry journal article supplement (doi:10.1039/c4ja00102h), 2014-01-01

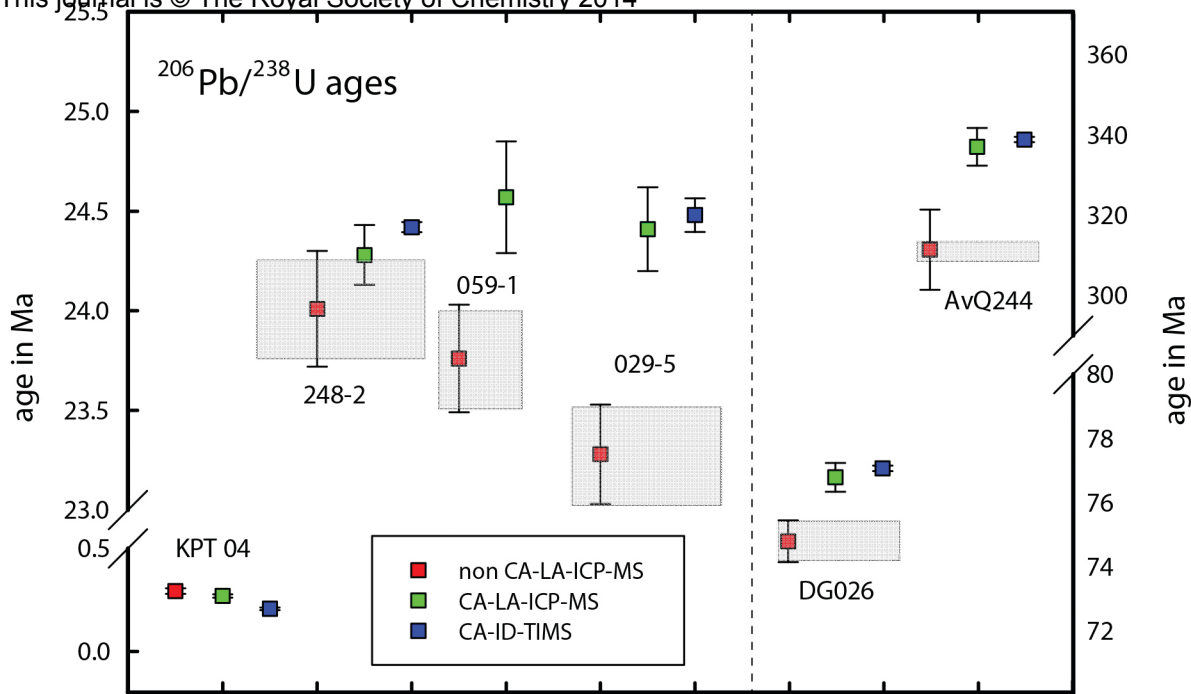

Supplement: c4ja00102h1.pdf [file c4ja00102h1.pdf]
